# Supplementary material for: Photoluminescence Enhancement in Two-Dimensional Semiconductors via Spacer-Free Metallic Screening
Source: Research Square preprint supplement (doi:10.21203/rs.3.rs-5636467/v1), 2024-12-23
Supplement: Supplementary file 1 [file a7085fd22620165b0183d5fa.docx]

**Supporting Information: Photoluminescence Enhancement in Two-Dimensional Semiconductors via Spacer-Free Metallic Screening**

Hafiz Muhammad Shakir1*, Abdulsalam Aji Suleiman2*, Kübra Nur Kalkan2, Doruk Pehlivanoğlu1, Amir Parsi2, Uğur Başçı1, Mehmet Atıf Durmuş2, Ahmet Osman Ölçer2, Hilal Korkut2, Cem Sevik3,4, İbrahim Sarpkaya2, Talip Serkan Kasırga2+

1 Department of Physics, Bilkent University, Ankara 06800 Turkey

2 Bilkent University UNAM – Institute of Materials Science and Nanotechnology, Ankara, 06800 Turkey

3 Department of Physics and NANOLab Center of Excellence, University of Antwerp, Groenenborgerlaan 171, B-2020 Antwerp, Belgium

4 Department of Mechanical Engineering, Faculty of Engineering, Eskişehir Techical University, Eskişehir 26555 Turkey

*Equal contribution

+ Corresponding email: kasirga@unam.bilkent.edu.tr

1. **
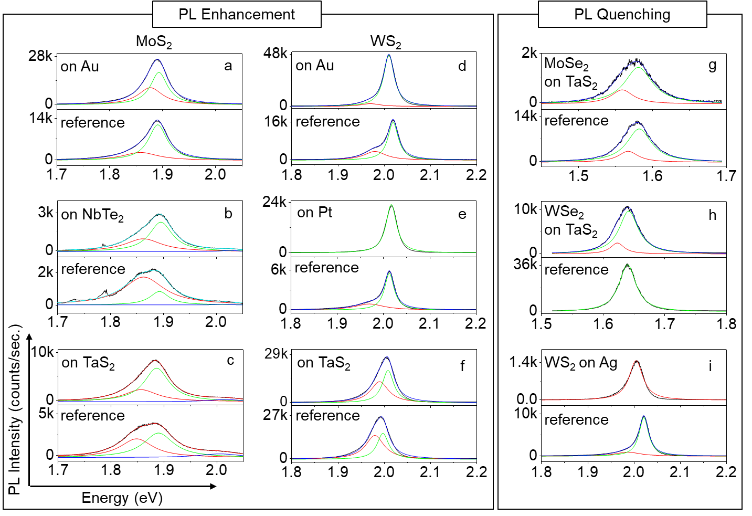
Photoluminescence enhancement and quenching in various metal-semiconductor junctions**

**Figure S1** The left panel shows a collection of PL spectra with enhancement (or no quenching) and the right panel shows a collection of PL spectra with quenching for various TMDC-metal heterojunctions. **a.** MoS2/Au, **b.** MoS2/NbTe2, **c.** MoS2/TaS2, **d.** WS2/Au, **e.** WS2/Pt, **f.** WS2/TaS2, **g.** MoSe2/TaS2, **h.** WSe2/TaS2, **i.** WS2/Ag. For bulk metals, reference PL spectra are collected from the TMDC on PDMS stamp. The red, green, and blue lines are Lorentzian fits corresponding to , , and , respectively. The sum of the fits is represented by cyan line.

1. **Optical enhancement factor calculations**

In the case for photoluminescence spectrum intensity measurements of heterostructures, optical interference effects must be taken into account to truly understand PL phenomenon[1]. This is because the incident laser beam passing through a material is reflected multiple times inside each layer of the heterostructure. These multiple internal reflections at each interface between layers with different refractive indices affect the PL intensity of the material[1,2].  
Our sample is made of WS2 (0.78nm) onto hBN/Au heterostructure with 40nm and 90nm thicknesses, respectively. To estimate PL response of our sample due to optical interference effects, we calculated an enhancement factor by taking the ratio of emission intensities for monolayer WS2 on-substrate and freestanding WS2[3].

- 1. **Freestanding WS2**

**d**

***Air***

***WS2***

***Air***

**Figure S2** Freestanding WS2 with thickness d.

- 1. **Absorption Coefficient Freestanding WS2 (λ = 532 nm):**

**x**

***0 (Air)***

***1 (WS2)***

***2 (Air)***

**Figure S3** Absroption of laser beam at a depth x in suspended WS2.

Refractive index of WS2 (medium-1) at λ=532 nm is . As the beam of light passes through any medium, there occurs a geometric phase difference

where β1 and βx are geometric phases for medium-1 with thickness d1 and x. Fresnel reflection and transmission coefficients are written to describe reflection and transmission of beam of light travelling from medium-i to medium-j;

|  |  | 1 |
| --- | --- | --- |

where t01 is the transmission coefficient for the beam from medium-0(Air) to medium-1 (WS2), r01 and r12 are reflection coefficients for the beam from medium-0(Air) to medium-1 (WS2) and from medium-1 (WS2) to medium-2 (Air), respectively.

To calculate the absorption coefficient at depth x, we consider each line passing through the point at d=x, and we make summation to find the total absorption at depth x [1,5]:

In general,

|  |  | 2 |
| --- | --- | --- |
|  |  | 3 |

The total amount of absorption at x can be expressed as a summation of all coefficients defined at d=x

|  |  | 4 |
| --- | --- | --- |

The second part of the right-hand side in Eqn(4) is written in terms of geometric sum

|  |  | 5 |
| --- | --- | --- |

Recalling Stoke’s relations between Fresnel reflection and transmission coefficients [4] and

|  |  | 6 |
| --- | --- | --- |

- 1. **Scattering Coefficient Freestanding WS2 (λ’ = 615 nm):**

**Figure S4** Scattering of laser beam at a depth x in suspended WS2.

**x**

***0 (Air)***

***1 (WS2)***

***2 (Air)***

Refractive index of WS2 (medium-1) at λ’=615 nm is [2]. The geometric phase differences at λ’=615 nm for medium-1 with thickness d1 and x

Corresponding Fresnel reflection and transmission coefficients can be written as

Similar to the absorption coefficient calculation, we consider each point at depth x and we make summation for the total scattering coefficient at depth x.

|  |  | 7 |
| --- | --- | --- |
|  |  | 8 |

By summing over scattering coefficients at depth x, the total amount of scattering coefficient becomes

|  |  | 9 |
| --- | --- | --- |
|  |  | 10 |

The last step for freestanding WS2 is to calculate its intensity using both total absorption and scattering coefficients [1]

|  |  | 11 |
| --- | --- | --- |

- 1. **On-substrate WS2**

**Figure S5** Schematic diagram of the beam of light passing through WS2 on-substrate hBN/Au.

**d2**

**d1**

**d**

***Air***

***WS2***

***hBN***

***Au***

**d3**

**d**

1 +

2 + …

= reff

In the case of WS2 on-substrate (Figure **S5**), considering bottom layers of WS2 as effective medium the effective Fresnel reflection coefficient is derived to define multiple reflections for absorption and scattering coefficients at depth x in medium-1[1]. For this reason, each term is written in terms of corresponding reflection and transmission coefficients including geometric phase differences

|  |  | 12 |
| --- | --- | --- |
|  |  |  |
|  |  |  |
|  |  |  |
|  | . | 13 |

Then the effective Fresnel reflection is written in terms of effective coefficients stated above

|  |  | 14 |
| --- | --- | --- |

Recalling geometric sum formulation, Equation 14 becomes

|  |  | 15 |
| --- | --- | --- |

Similarly, considering reflection and transmission coefficients’ relation (Stoke’s relations) (and ) [3,4],

|  |  | 16 |
| --- | --- | --- |

where β2 is geometric phase difference related to medium-2.

- 1. **Absorption Coefficient WS2-on-substrate (λ = 532 nm):**

***0 (Air)***

***1(WS2 )***

**x**

**d**

**Figure S6** Schematic diagram of light beam passing through a sample with WS2 (medium-1), hBN (medium-2) and Au (medium-3). Dots on the dashed line represent the points of absorption at depth x.

Refractive indices of WS2, hBN and Au at λ=532 nm and corresponding geometric phase differences for medium-1 and medium-2 are expressed as

As we will define the effective Fresnel reflection coefficient for both absorption and scattering cases, we start with the effective reflection for absorption (λ=532nm) *(*

|  |  | 17 |
| --- | --- | --- |

where and .

Similar to the freestanding case, we take into account each line passing through the point at in order to find total absorption coefficient

|  |  | 18 |
| --- | --- | --- |
|  |  | 19 |

It is important to note that *t01*, *r10*, *β1* and *βx* are the same as the case for freestanding WS2.
For on-substrate WS2, the total amount of absorption

|  |  | 20 |
| --- | --- | --- |
|  |  | 21 |

- 1. **Scattering Coefficient WS2-on-substrate (λ’ = 615 nm):**

Refractive indices of WS2, hBN and Au at λ’=615 nm and corresponding geometric phase differences for medium-1 and medium-2 are written as

[2]

The effective Fresnel reflection for scattering

|  |  | 22 |
| --- | --- | --- |

where and .

**Figure S7** Scattering of laser beam at a depth x in WS2 on hBN/Au substrate. hBN/Au substrate is considered as the effective medium.

***0 (Air)***

***1(WS2)***

**x**

Total amount of scattering at depth x:

|  |  | 23 |
| --- | --- | --- |
|  |  | 24 |

where *t10*, *r’10*, *β’1* and *β’x* are the same as the case for freestanding WS2.

For on-substrate WS2, the total amount of scattering becomes

|  |  | 25 |
| --- | --- | --- |
|  | . | 26 |

Similar to Equation 11, the intensity of WS2 on-substrate is

|  |  | 27 |
| --- | --- | --- |

The last step is to define the enhancement factor by taking a ratio of Equation 27 and Equation 11 [2,5]

|  |  | 28 |
| --- | --- | --- |

With the help of the enhancement factor expression stated above, we calculated the enhancement factor (Γ) for hBN thickness :

Also, we calculated the enhancement factor as a function of the hBN thickness in nm :


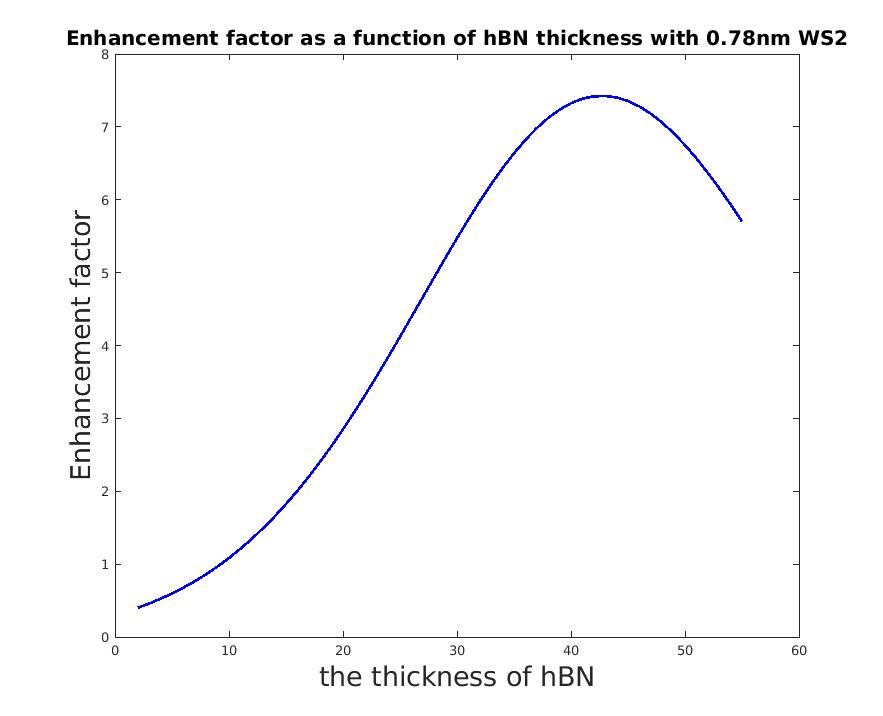


**Figure S8** Enhancement Factor as a function of hBN thickness[6].

1. **Gate dependent PL experiments**

**
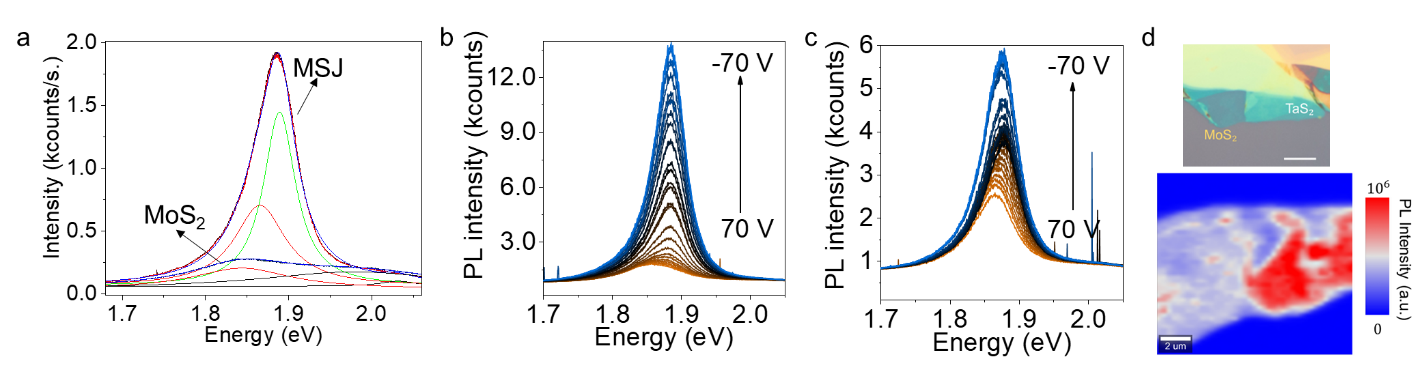
**

**Figure S9. Gate dependent PL measurements. a.** Gate dependent PL at 150 and 200 V for the sample presented in the main text. Fits to the PL spectra are also provided. **b.** PL spectra from 70 to -70 V gate voltage for bare MoS2 and **c.** for TaS2/MoS2 on SiO2/Si substrate. **d.** The optical microscope image and the PL intensity map is provided. The scale bar for the optical upper panel is 10 µm.

1. **AFM Height Trace of Bilayer WS2 Before and After Thermal Annealing**

**
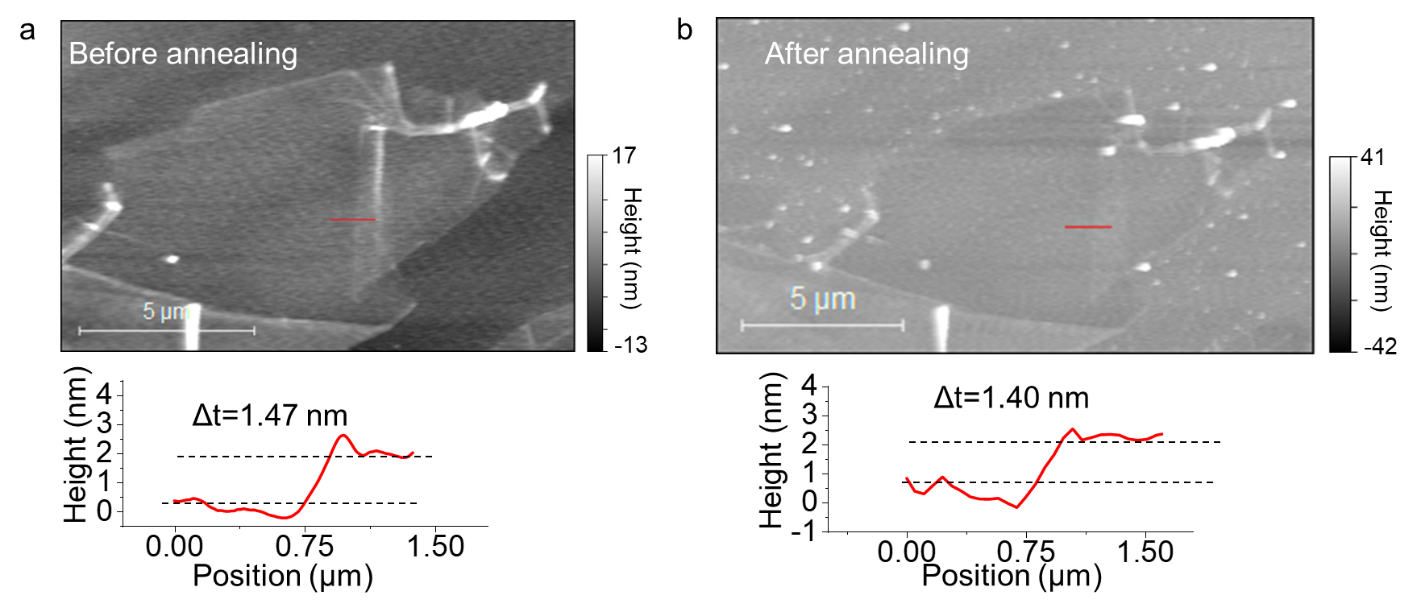
**

**Figure S10 | AFM Height Trace of Folded Part of monolayer WS2. a.** AFM height trace from the folded part of the monolayer crystal shows 1.47 nm thickness over the monolayer and **b.** after annealing, the height trace from the bilayer region shows minimal change while the monolayer part height decreases by 0.50 nm.

1. **XPS Measurements**

**
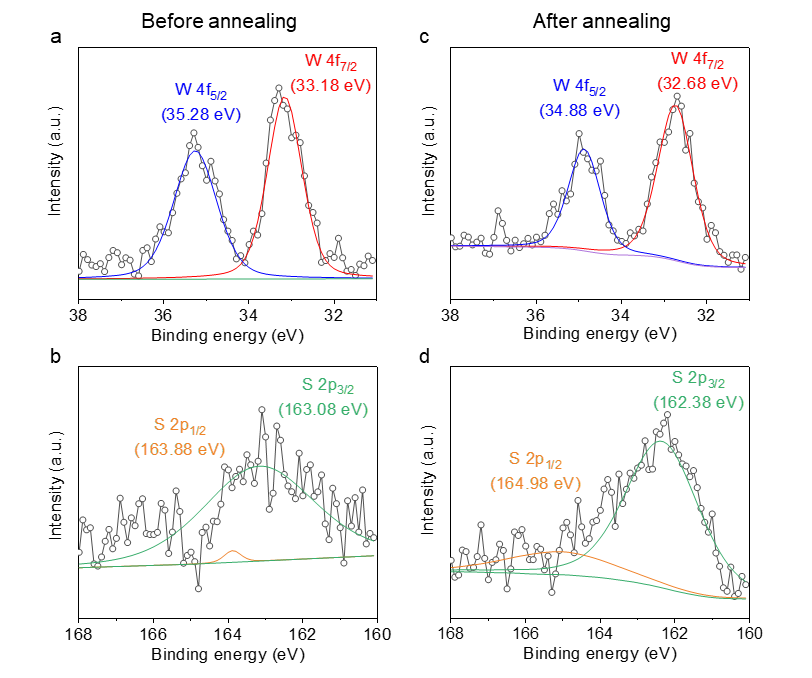
**

**Figure S11** **Effect of annealing on the MSJ.** The XPS spectra of WS2 multilayer **a.** W4f and **b.** S2p survey before annealing and **c.** W4f and **d.** S2p survey after annealing. The W peaks shift by 0.4 eV due to the charge transfer across the metal and the WS2.

1. **Temperature Dependent PL Measurements**

**
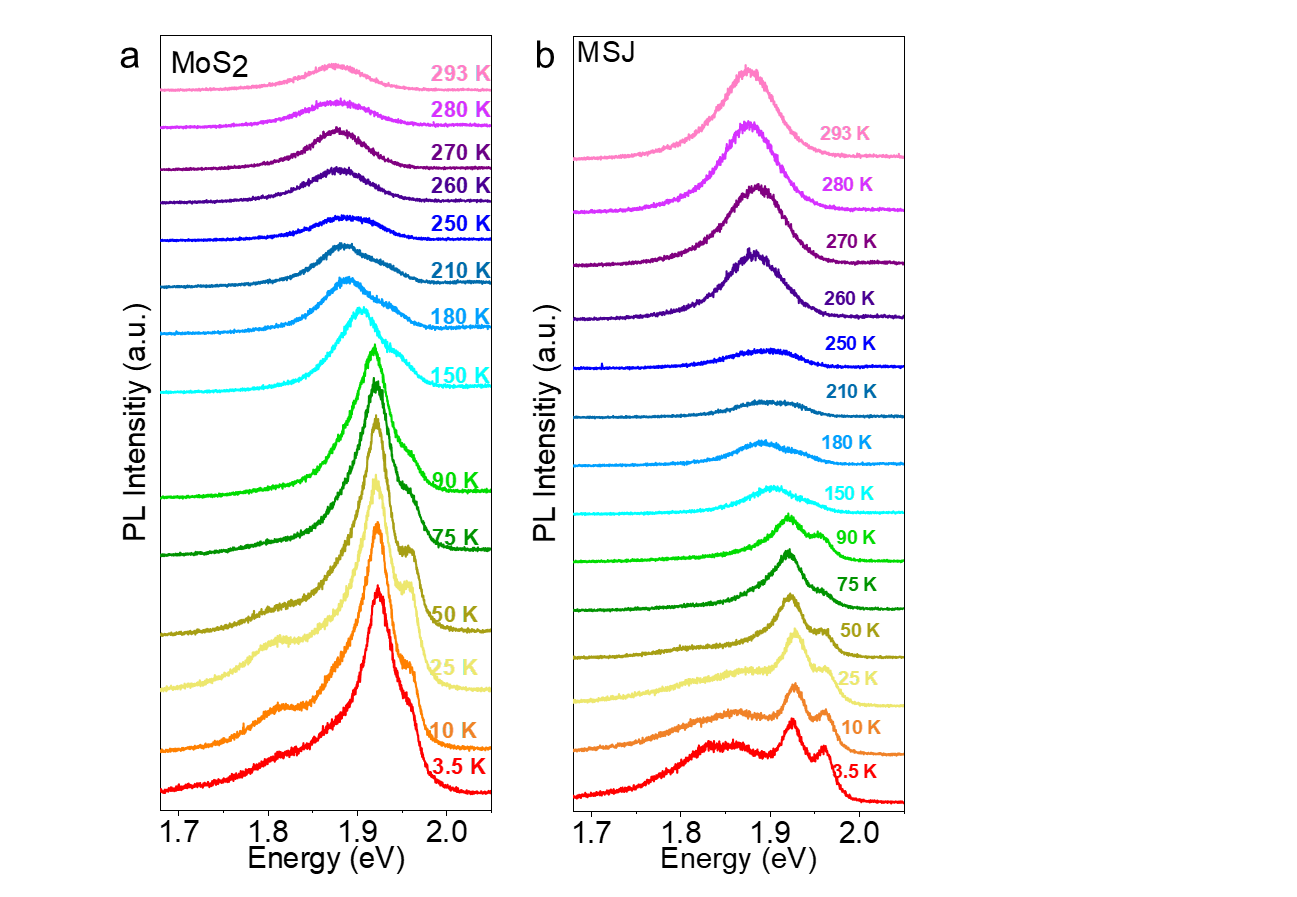
**

**Figure S12 | Temperature Dependent PL Spectra.** **a.** Temperature-dependent PL spectra for monolayer MoS2 and **b.** MoS2/TaS2 heterostructure. Below 250 K, enhancement disappears. As discussed in the main text, this can be attributed to the decrease in the van der Waals gap height as a result of the shrinkage of the hydrocarbon and water molecules between the layers. The PL spectra is shifted for viewing convenience. All spectra have the same absolute scale.

1. **DFT Results**

Before conducting the multi-layer investigation, we initially computed the electronic properties of the single-layer MoS2, as illustrated in **Figure S13a**. As anticipated, the GW correction significantly affects the electronic energies, owing to the robust effective dielectric screening that alters the functional nature of the Coulomb interaction. The calculated band-gap value of 2.571 eV at the high-symmetry K point for this direct band-gap monolayer aligns well with prior calculations[7]. Additionally, the calculated quasiparticle peak energies, 1.96 and 2.10 eV are consistent with previous investigations[8] and the values obtained in our measurements.

Due to the substantial mismatch between the equilibrium in-plane lattice constants of TaS2 and MoS2, we initially examine the hetero-bilayer MoS2-TaS2 structure with MoS2's in-plane lattice parameters, while allowing all ions to relax along out-of-plane directions. In this context, we assume that our approach to synthesizing this hetero-bilayer structure without annealing does not create significant strain on the MoS2 layer. Within the hetero-bilayer arrangement, the higher-lying valence states of the MoS2 layer are located approximately 400 meV below the Fermi level, potentially enhancing exciton intensity, see **Figure S13b**. Surprisingly, the direct GW band gap corresponding to the MoS2 layer reduces to 1.965 eV. Given this observation, one might anticipate a significant redshift in the direct exciton energy, yet we predict only minor meV redshifts in photoluminescence (PL) measurements. Generally, we would expect a noticeable alteration in the semiconductor layer due to the metallic screening around the Fermi level induced by the metallic substrate, whereas the observed reduction is significant. This prompt questioning the validity of the plasmon-pole approximation employed in our GW calculations. While this method typically performs well for semiconductors, its application to this hybrid structure (metal/semiconductor) may underestimate the band gap of the MoS2 layer. Alternatively, the van der Waals distance between the MoS2 and TaS2 after direct transfer, without annealing, may be considerably greater than theoretical predictions.


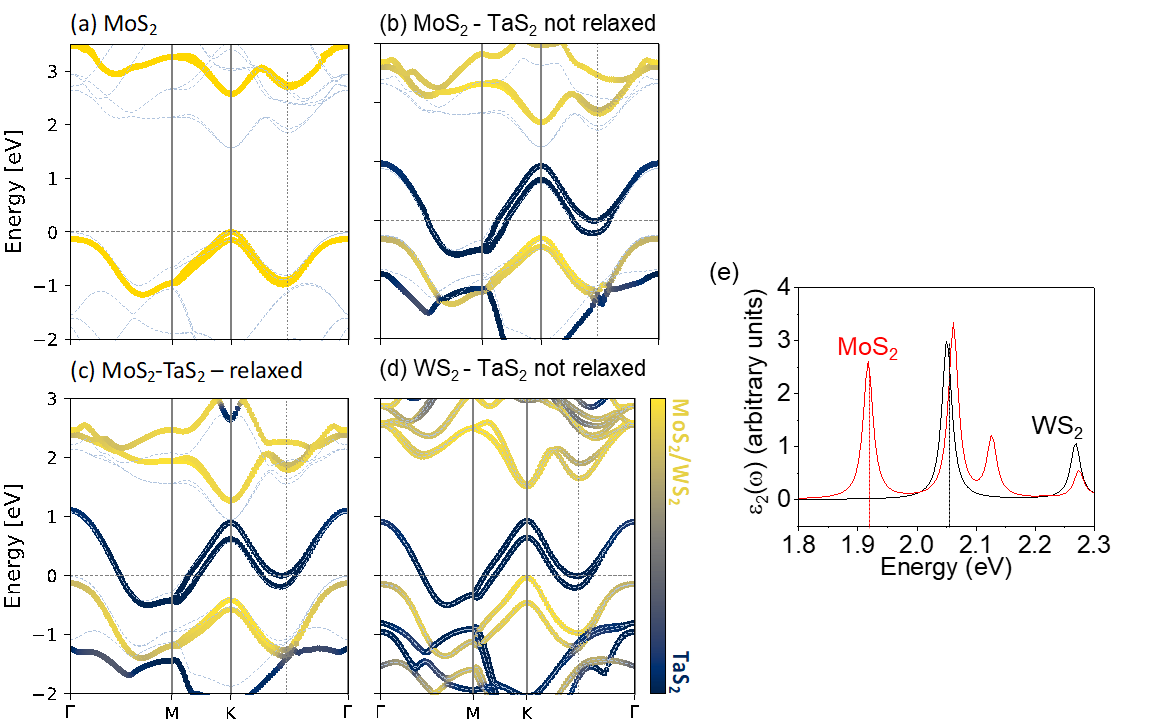


**Figure S13 |** **ab initio calculations.** The calculated band structures of **(a)** single layer MoS2, **(b)** MoS2-TaS2 heterobilayer with single layer MoS2 in-plane lattice constant, **(c)** MoS2-TaS2 heterobilayer with PBE relaxed lattice constants, and **(d)** WS2-TaS2 heterobilayer with single layer WS2 in-plane lattice constant. The color bar represents the layer contributions to the corresponding electronic state. For MoS2 structures, the dashed linesa and symbols represent the G0W0 and PBE calculations. For WS2, only PBE results are presented. **(e)** The optical emission spectra for MoS2 and WS2 are given by the imaginary part of the excitonic macroscopic dielectric function . Direct transition energy for excitons are 1.917 and 2.049 eV for MoS2 and WS2, respectively.

1. **Photoluminescence Quantum Yield Measurements**

**
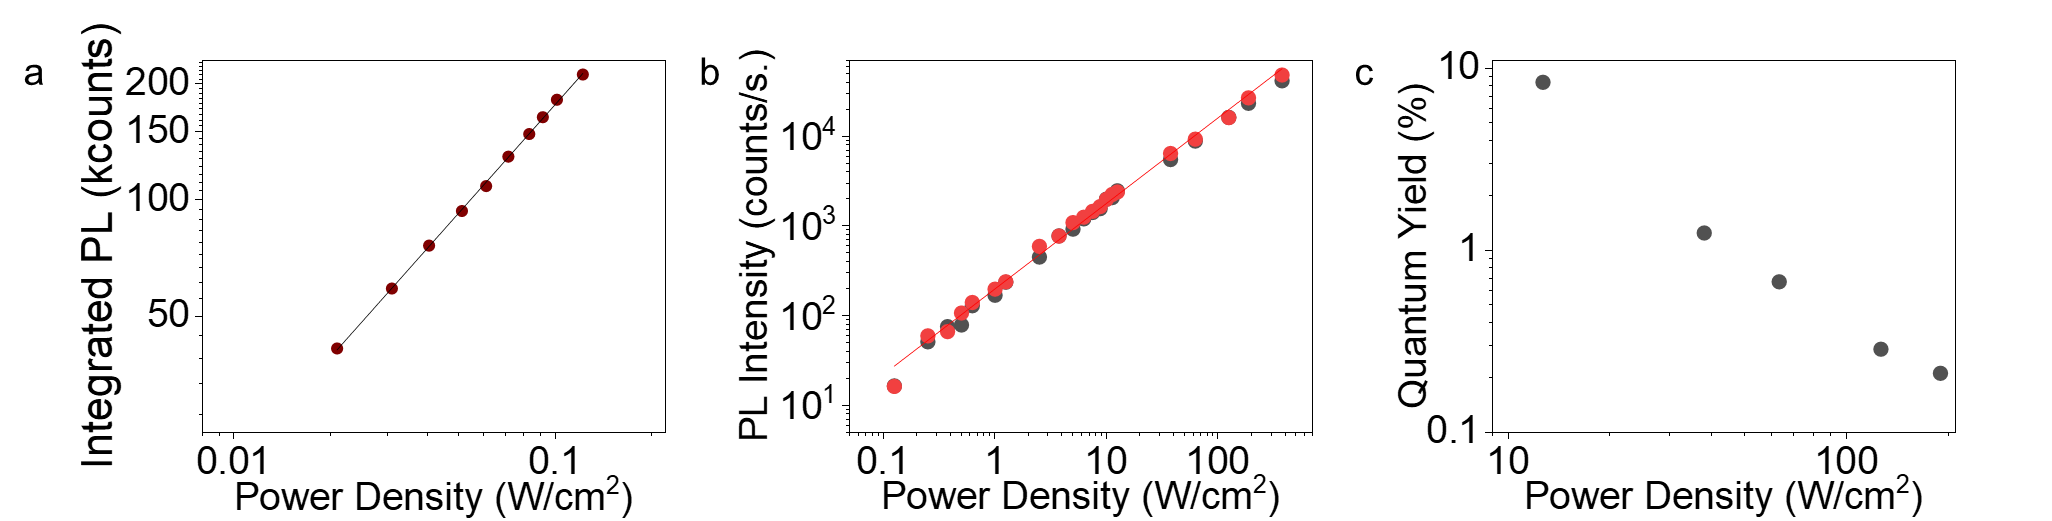
**

**Figure S14 | Quantum yield measurements. a.** Integrated PL counts vs. power density are given for R6G-embedded PMMA film on a glass substrate. PL spectra are collected using an integrating sphere. The laser beam is focused on a mm2 sized Gaussian spot. As a result, lower power densities are achieved than the tightly focused beam. **b.** PL intensity vs. power density measurements collected from a WS2 monolayer on Au substrate. Red and grey dots represent PL intensity counts collected from different parts of the sample. **c.** Quantum yield calculations were performed for the sample provided in **b** using the calibration data from the R6G crystals and the calibration data. All PL spectra is collected with 532 nm excitation laser.

1. **References**

[1] Buscema M, Steele G A, van der Zant H S J and Castellanos-Gomez A 2014 The effect of the substrate on the Raman and photoluminescence emission of single-layer MoS2 *Nano Res* **7** 561–71

[2] Lee Y, Forte J D S, Chaves A, Kumar A, Tran T T, Kim Y, Roy S, Taniguchi T, Watanabe K, Chernikov A, Jang J I, Low T and Kim J 2021 Boosting quantum yields in two-dimensional semiconductors via proximal metal plates *Nat Commun* **12**

[3] Born M and Wolf E 1980 *Principles of optics: Electromagnetic theory of propagation, interference and diffraction of light* (Elsevier Science Limited)

[4] Pedrotti F L, Pedrotti L S and Pedrotti L M 2007 *Introduction to Optics* (Cambridge University Press)

[5] Yoon D, Moon H, Son Y-W, Choi J S, Ho Park B, Cha Y H, Kim Y D and Cheong H *Interference effect on Raman spectrum of graphene on SiO 2 /Si*

[6] The MathWorks Inc. 2021 MATLAB R2021b

[7] Guandalini, A., D’Amico, P., Ferretti, A. & Varsano, D. Efficient GW calculations in two dimensional materials through a stochastic integration of the screened potential. *npj Comput. Mater.* **9**, 44 (2023).

[8] Chernikov, A. *et al.* Exciton Binding Energy and Nonhydrogenic Rydberg Series in Monolayer WS2 *Phys. Rev. Lett.* **113**, 76802 (2014).
